# Supplementary material for: ALKBH5 is a prognostic factor and promotes the angiogenesis of glioblastoma
Source: PubMed Central journal article supplement (PMC10788339; doi:10.1038/s41598-024-51994-9), 2024-01-14
Supplement: 41598_2024_51994_MOESM1_ESM.pdf [file 41598_2024_51994_MOESM1_ESM.pdf]

A

ALKBH5

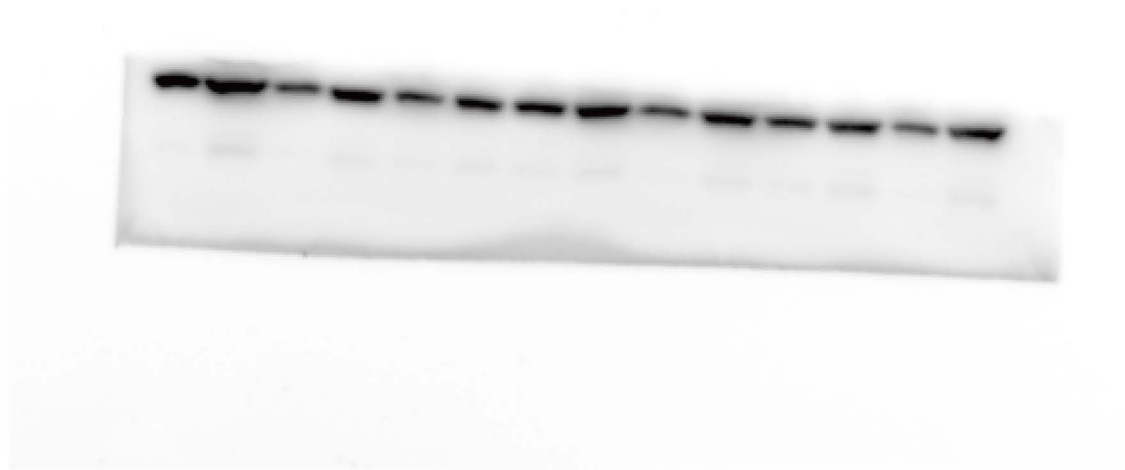

B

GAPDH

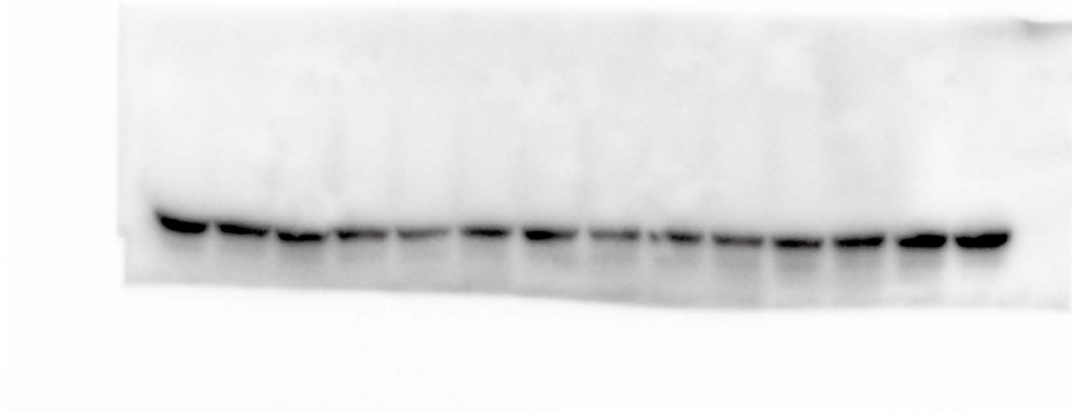

**Supplementary Figure1:** The original gel of clinical samples represent the ALKBH5 (A) and GAPDH (B) expressions.

A

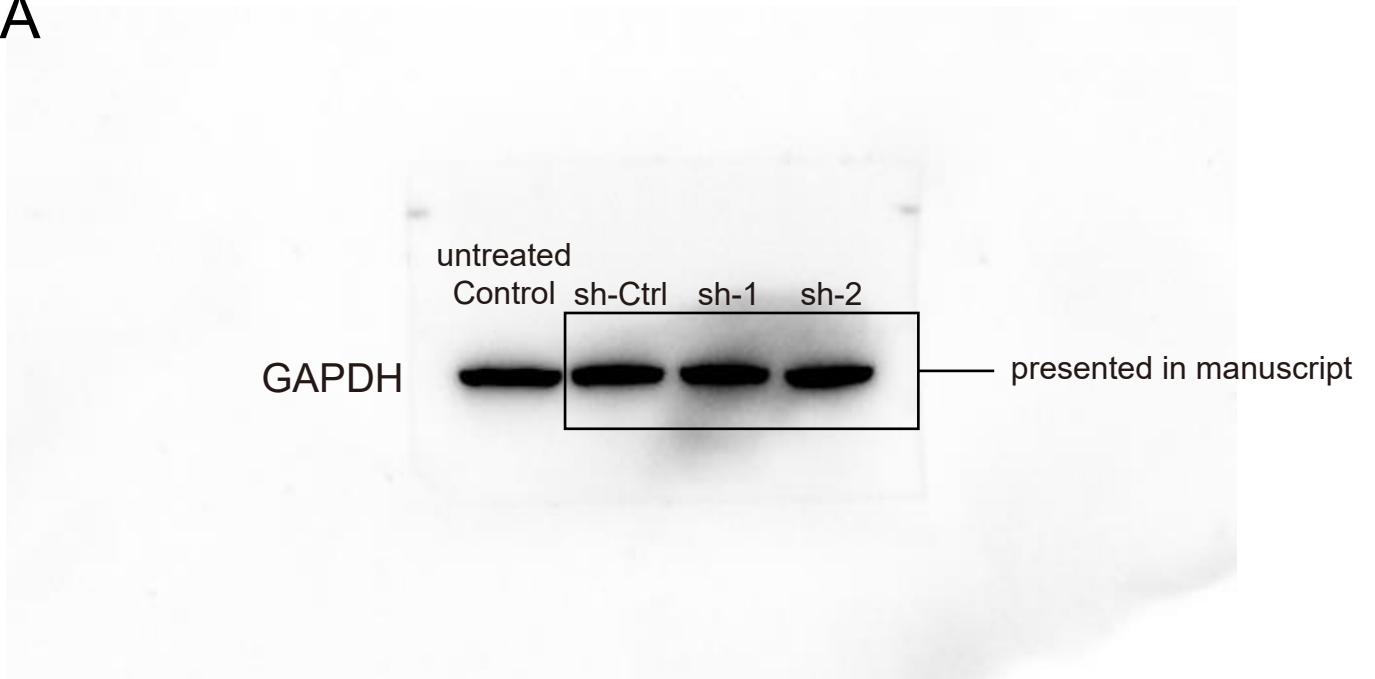

B

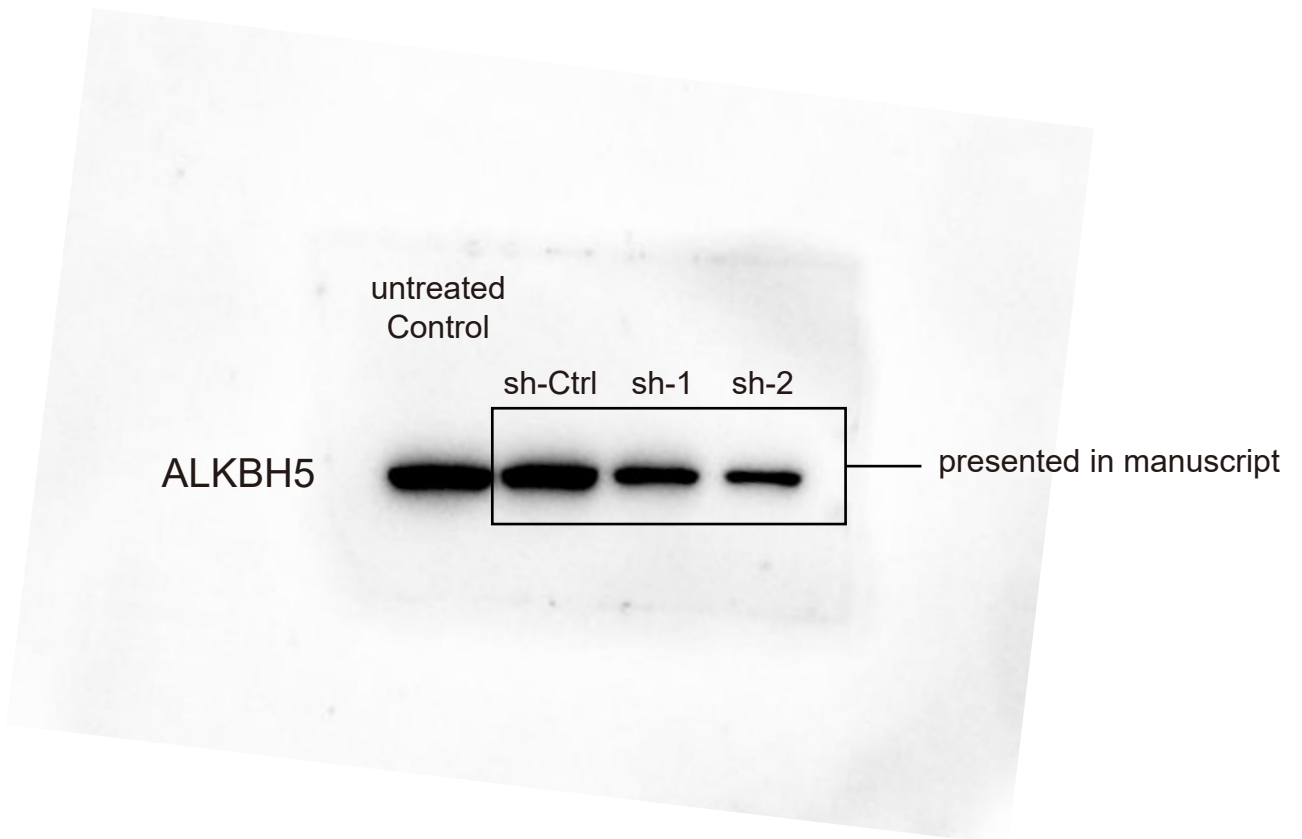

**Supplementary Figure2:** The original gel of U87 cells transfected with shRNAs represent the ALKBH5 (B) and GAPDH (A) expressions.

**A**

VEGFA

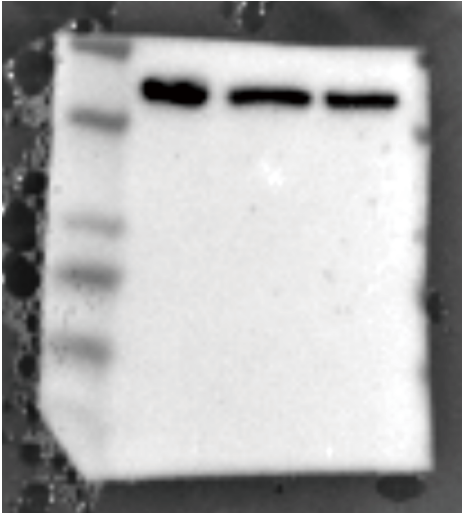**B**

FGFR1

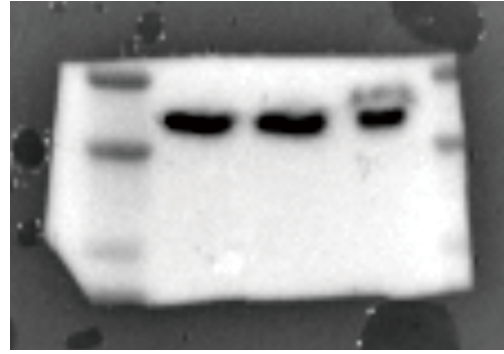**C**

VAV1

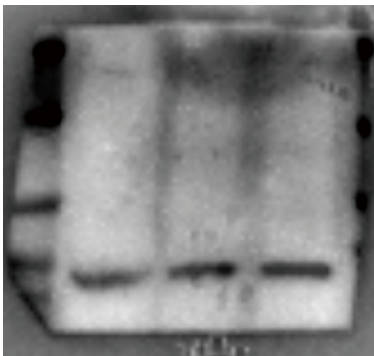**D**

GAPDH

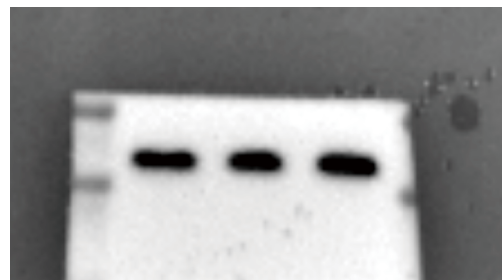

**Supplementary Figure3:** The original gel of U87 cells transfected with shRNAs represent the VEGFA (A),FGFR1(B), VAV1(C) and GAPDH (D) expressions.
